# Supplementary material for: Biocontrol of Strawberry Powdery Mildew by Bacillus altitudinis DXHS: Mechanistic Insights from Transcriptome Analysis
Source: Research Square preprint supplement (doi:10.21203/rs.3.rs-8283834/v1), 2025-12-22
Supplement: Supplementary file 1 [file 50c46433ee01f06a5e3d6b62.docx]

Supplementary Material

# Supplementary Figures and Tables

##
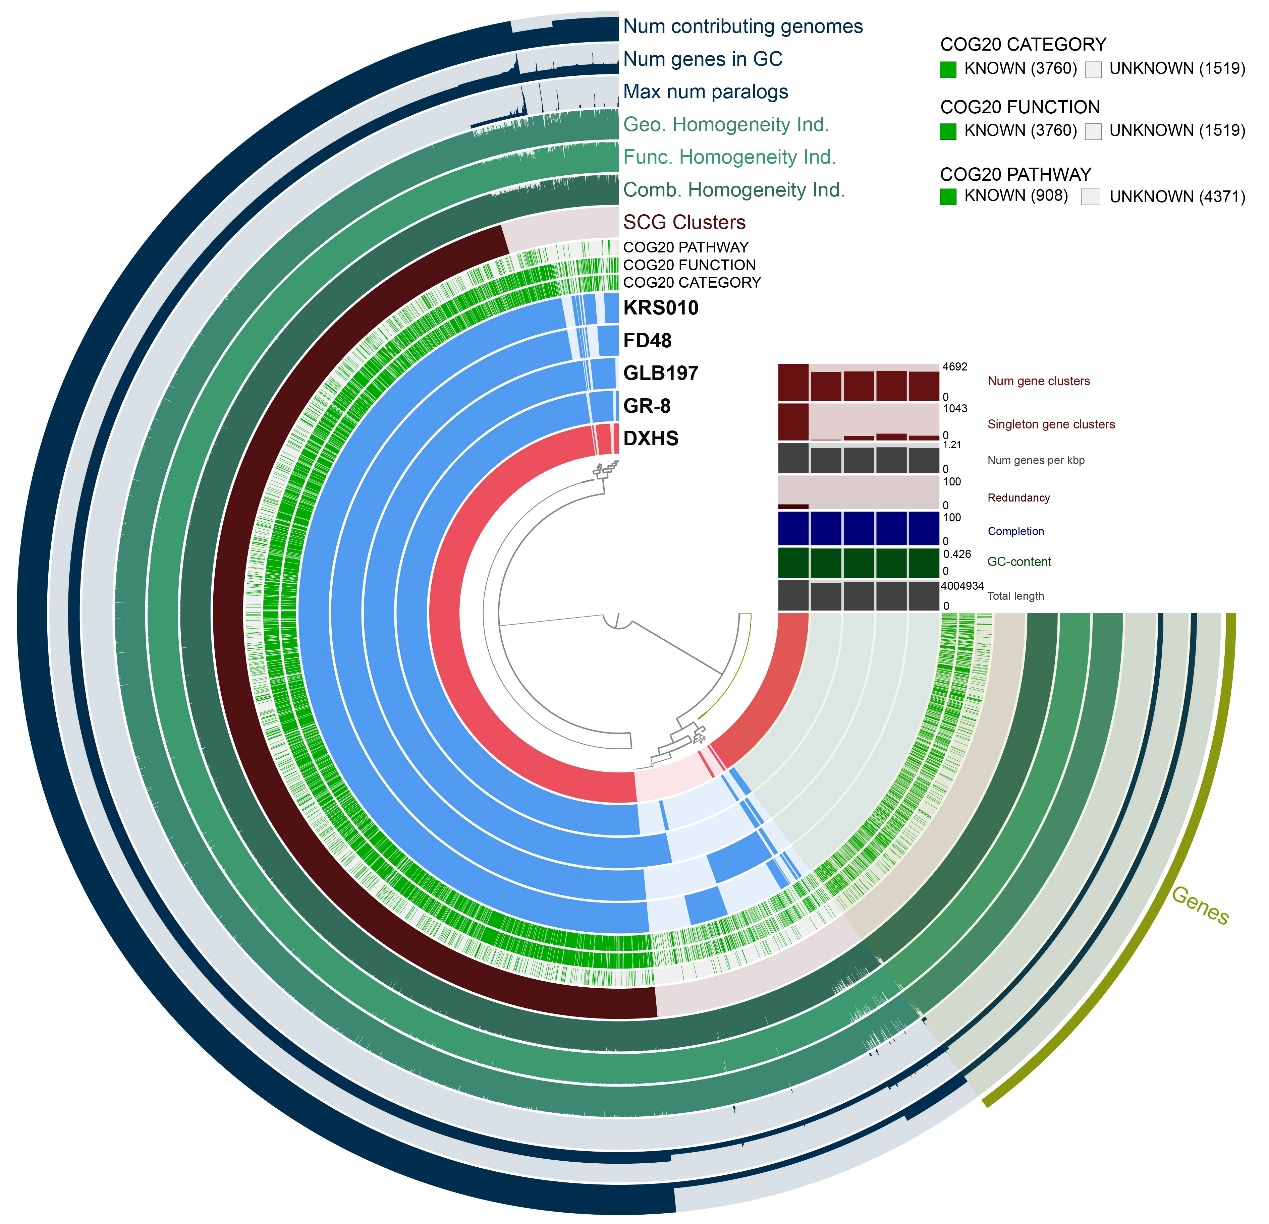


Fig S1 Genomic comparison between the DXHS strain and the reference strains


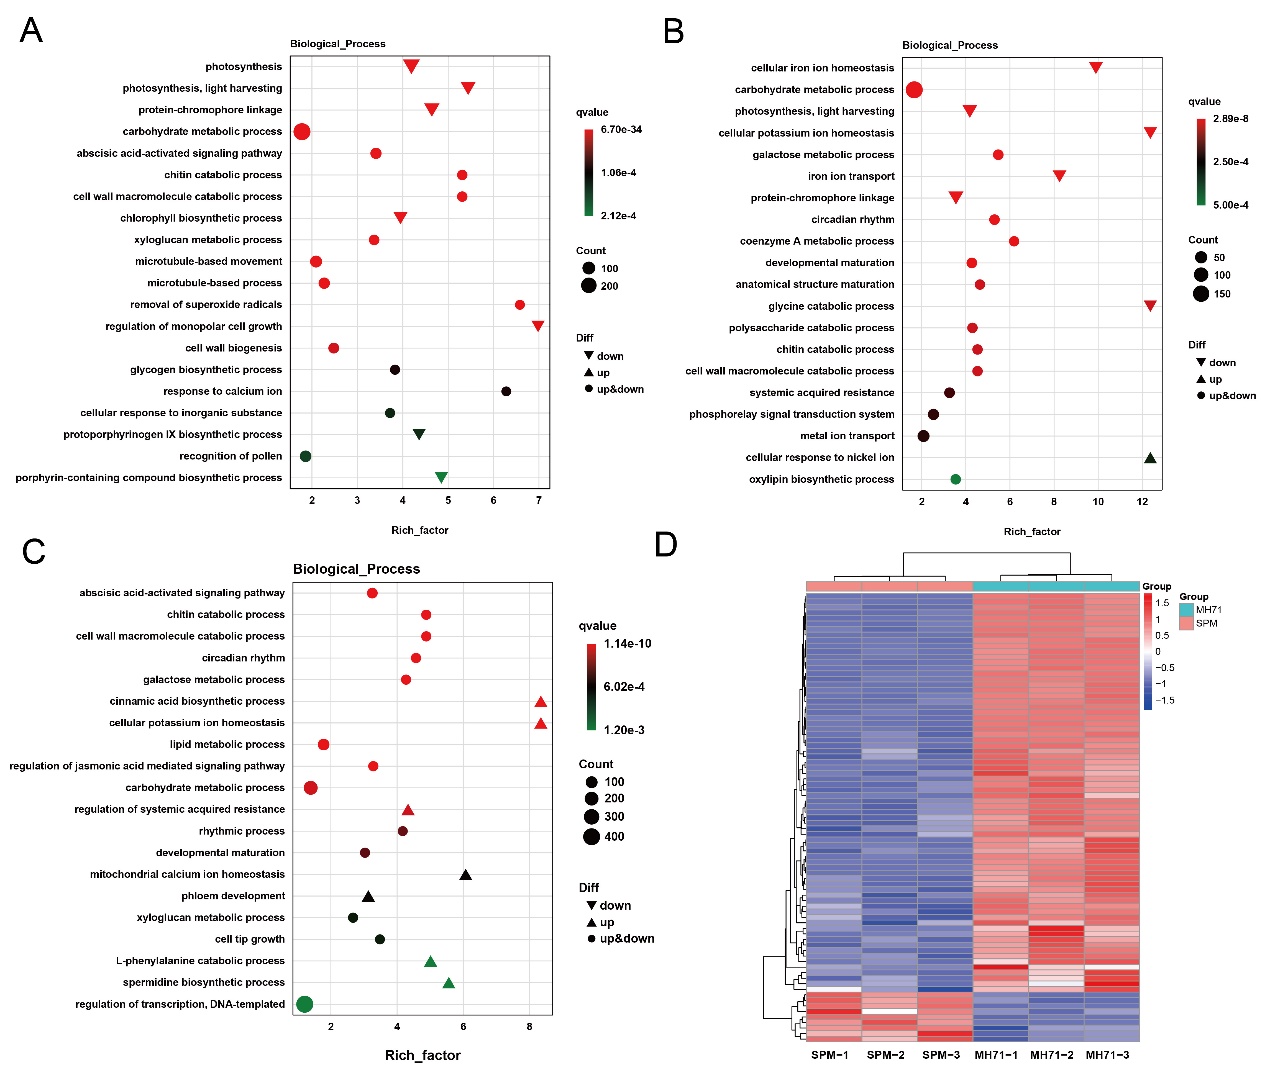


Fig S2 GO enrichment analysis of DEGs. (A) GO enrichment of DEGs in DXHS vs. CK; (B) GO enrichment of DEGs in DXHS vs. MH71; (C) GO enrichment of DEGs in MH71 vs. SPM; (D) Expression heatmap of DEGs in plant disease resistance pathway in MH71 vs. SPM.


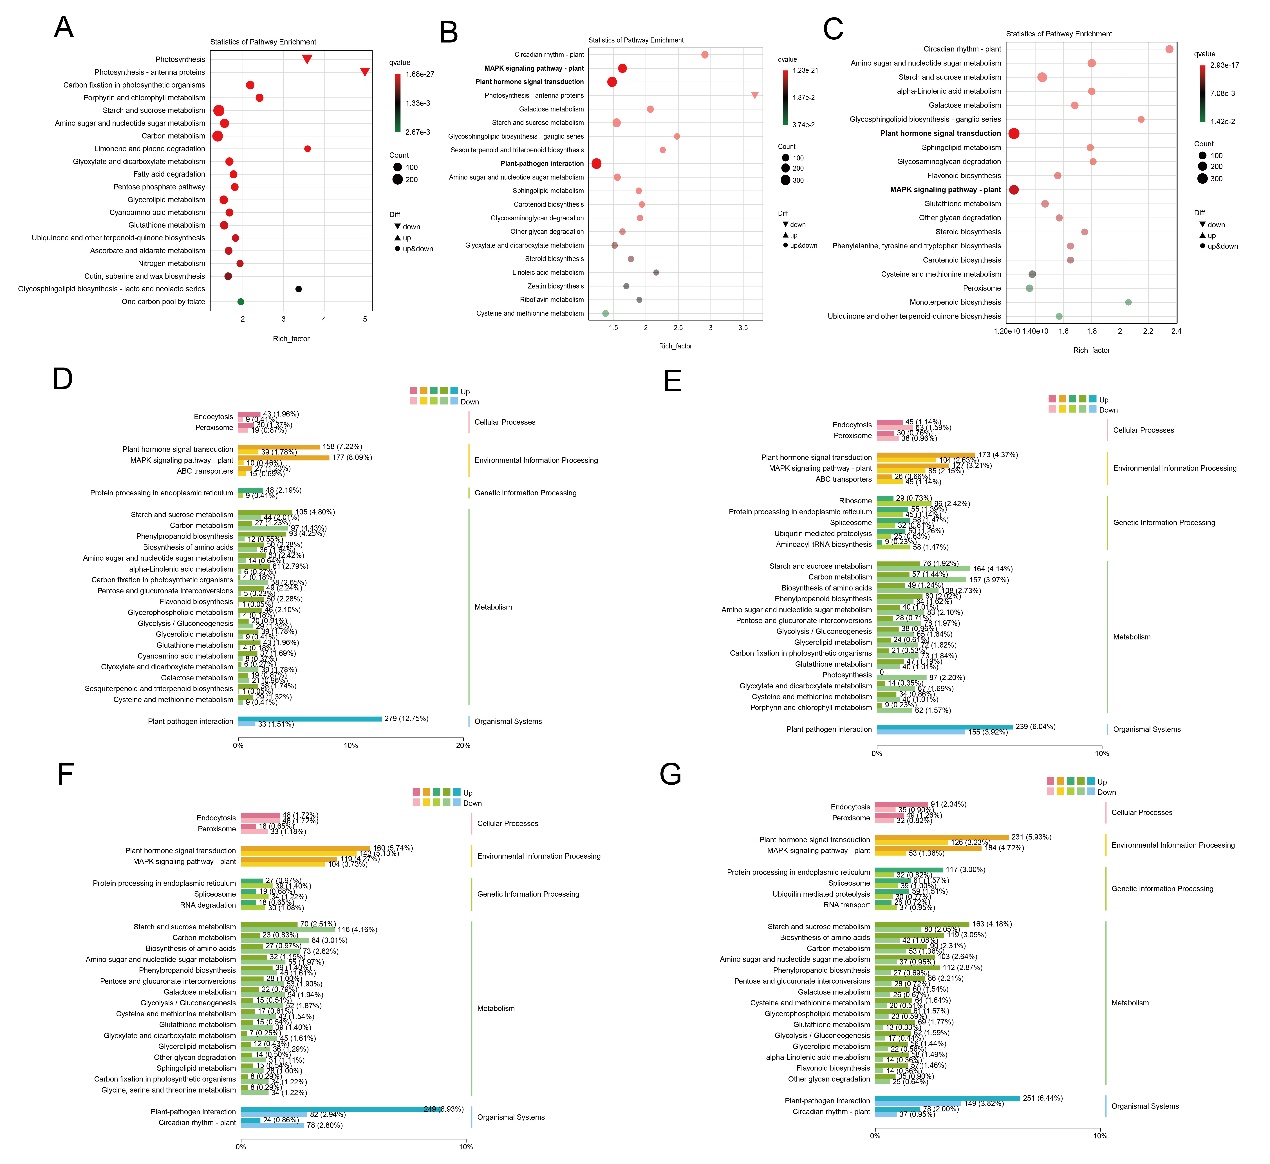


Fig S3 KEGG pathway enrichment analysis of DEGs. (A-C) KEGG pathway enrichment of DEGs in DXHS *vs*. CK, DXHS *vs*. MH71, and MH71 *vs*. SPM; (D-G) KEGG classification plots (upregulated/downregulated genes) of DEGs in comparisons of DXHS *vs*. SPM, DXHS *vs*. CK, DXHS *vs.* MH71, and MH71 *vs.* SPM.

Table S1 Primer sequences used for qRT-PCR validation in this study.

| Target Genes | Primer Name | Primer Sequence (5′→3′) |
| --- | --- | --- |
| *MPK3* | MPK3-F | GACATGGCTGACCACCTCCC |
| MPK3-R | GATCGGCATGATCGGAGGGC |
| *MPK6* | MPK6-F | GGTCAATCAGGAGACACGG |
| MPK6-R | CTTGTACTTGGCCGTGACC |
| *PR1* | PR1-F | CTTGCGCCGCTGGTAAGGTC |
| PR1-R | GCCCGGGGGATCATAGTTGC |
| *FRK1* | FRK1-F | GCTCATCCATGTCGCTCCCC |
| FRK1-R | GCCTCCAGTTGAGTGCCAAGG |
| *ACS6* | ACS6-F | CCGCATTGTTATGAGCGG |
| ACS6-R | GGCTGCTCTCGTGATCTTG |
| *OXI1* | OX11-F | GCACCGCAAGTCAAAACTG |
| OX11-R | CCTGACTTCGGAGCCTTTG |
| *VSP2* | VSP2-F | GGGTTTCGAATGAGGCTGG |
| VSP2-R | CATTCCCTTGTCGACCCAC |
| *RTE1* | RTE1-F | GGCATTTGCAGGGAGGATGGTGC |
| RTE1-R | GCTTGCAAGTGTGGCCACCCAG |
| *ETR* | ETR-F | GCTGTTGGGGATGAGAACCGGC |
| ETR-R | GGCCGTCACTTGGCGCTGG |
| *CTR1* | CTR1-F | GGTCAGGGCAACACCATCAGCCC |
| CTR1-R | GGCATCCGGTACCGTGCAGAGG |
| *MKK9* | MKK9-F | CGCCGCCAACTCTACCGCG |
| MKK9-R | GGCCTCGGAGAACGTGCCTTGC |
| *EIN3* | EIN3-F | CAGTCACAGGGGCATCGGAC |
| EIN3-R | GGGTTGCACCCATCGTTCC |
| *ERF1* | ERF1-F | GGCGTCAGGGTTTGGCTTG |
| ERF1-R | CGAGTGCCTCCTCTTGAGTGC |
| *ChiB* | ChiB-F | CGCTGCATTTCTTGGGTCAAACCTC |
| ChiB-R | GTATATCACTCCATATCCAGGTACCG |

Table S2 The inhibition rate of *B. altitudinis* DXHS against *F. oxysporum* and *C. siamense*.

| Target fungi | Inhibition rate (%) |
| --- | --- |
| *F. oxysporum* 1769 | 60.92±2.07 |
| *C. siamense* 1755 | 57.39±3.89 |
